# Supplementary material
Source: MDPI journal article supplement (https://www.mdpi.com/2073-4395/13/8/2164)
Supplement: s1 [file s1]

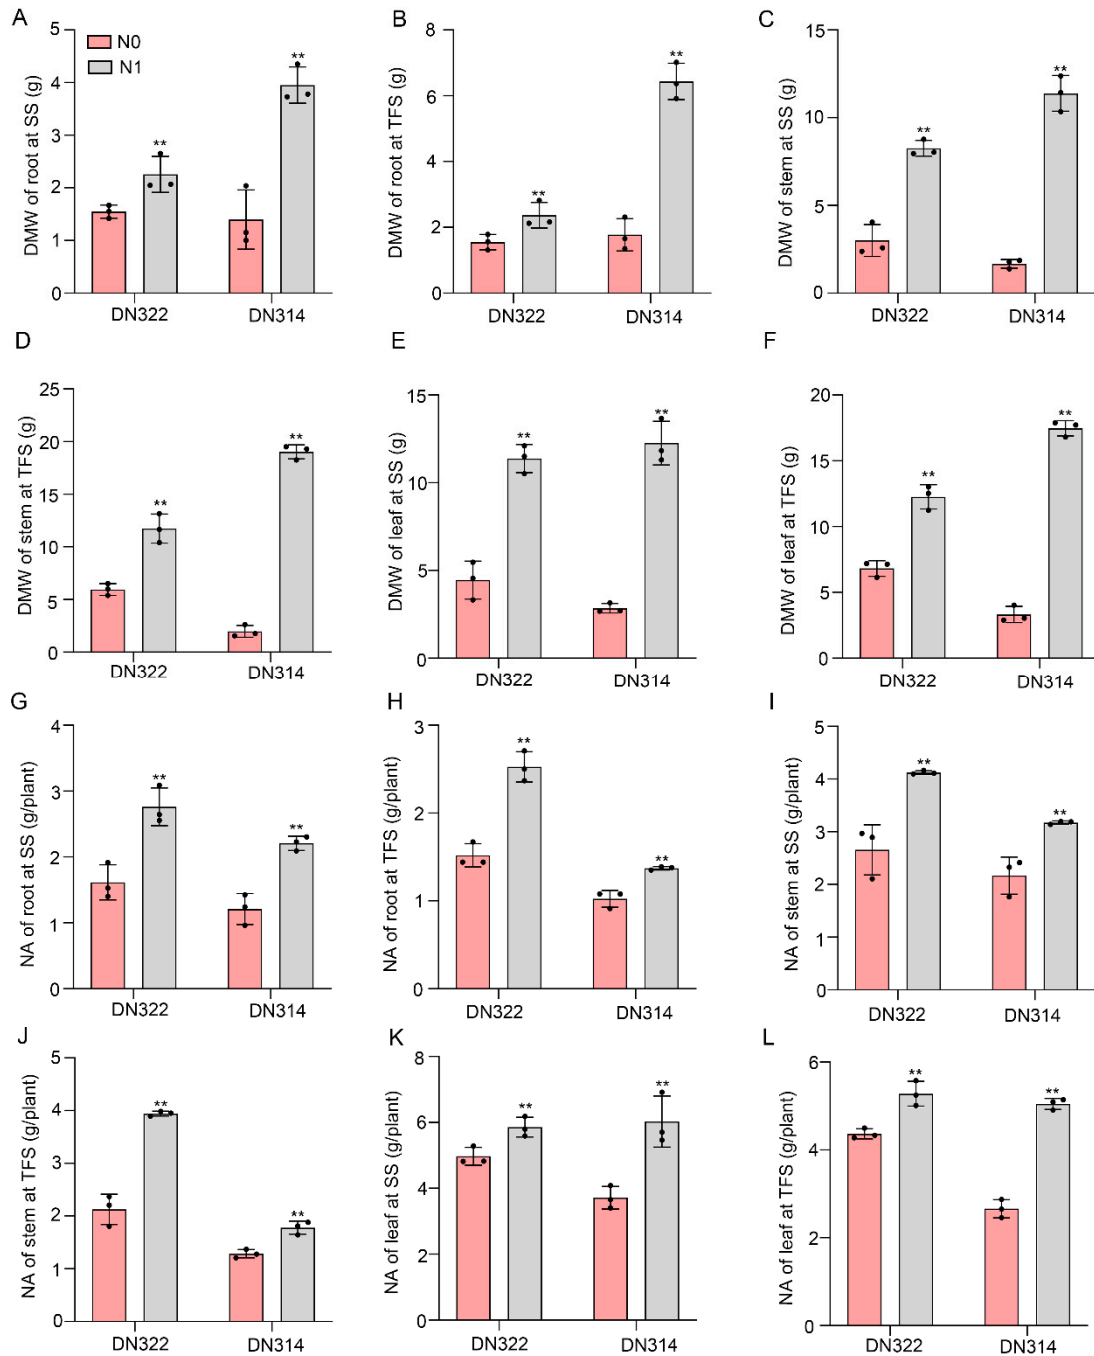

Supplemental Figure S1 Effects of nitrogen deficiency stress on potato (A-F) Effects of nitrogen deficiency stress on potato dry matter of different organ. (G-L) Effects of nitrogen deficiency stress on potato nitrogen accumulation of different organ. DMW represents dry matter weight, SS represents seedling stage, TFS represents tuber formation stage. Data in Supplemental Figure S1 are means $\pm$ SD. Two-tailed unpaired t test with Welch's correction is used for statistical analysis. Statistically great significant differences ( $P < 0.01$ ) are indicated by two stars.

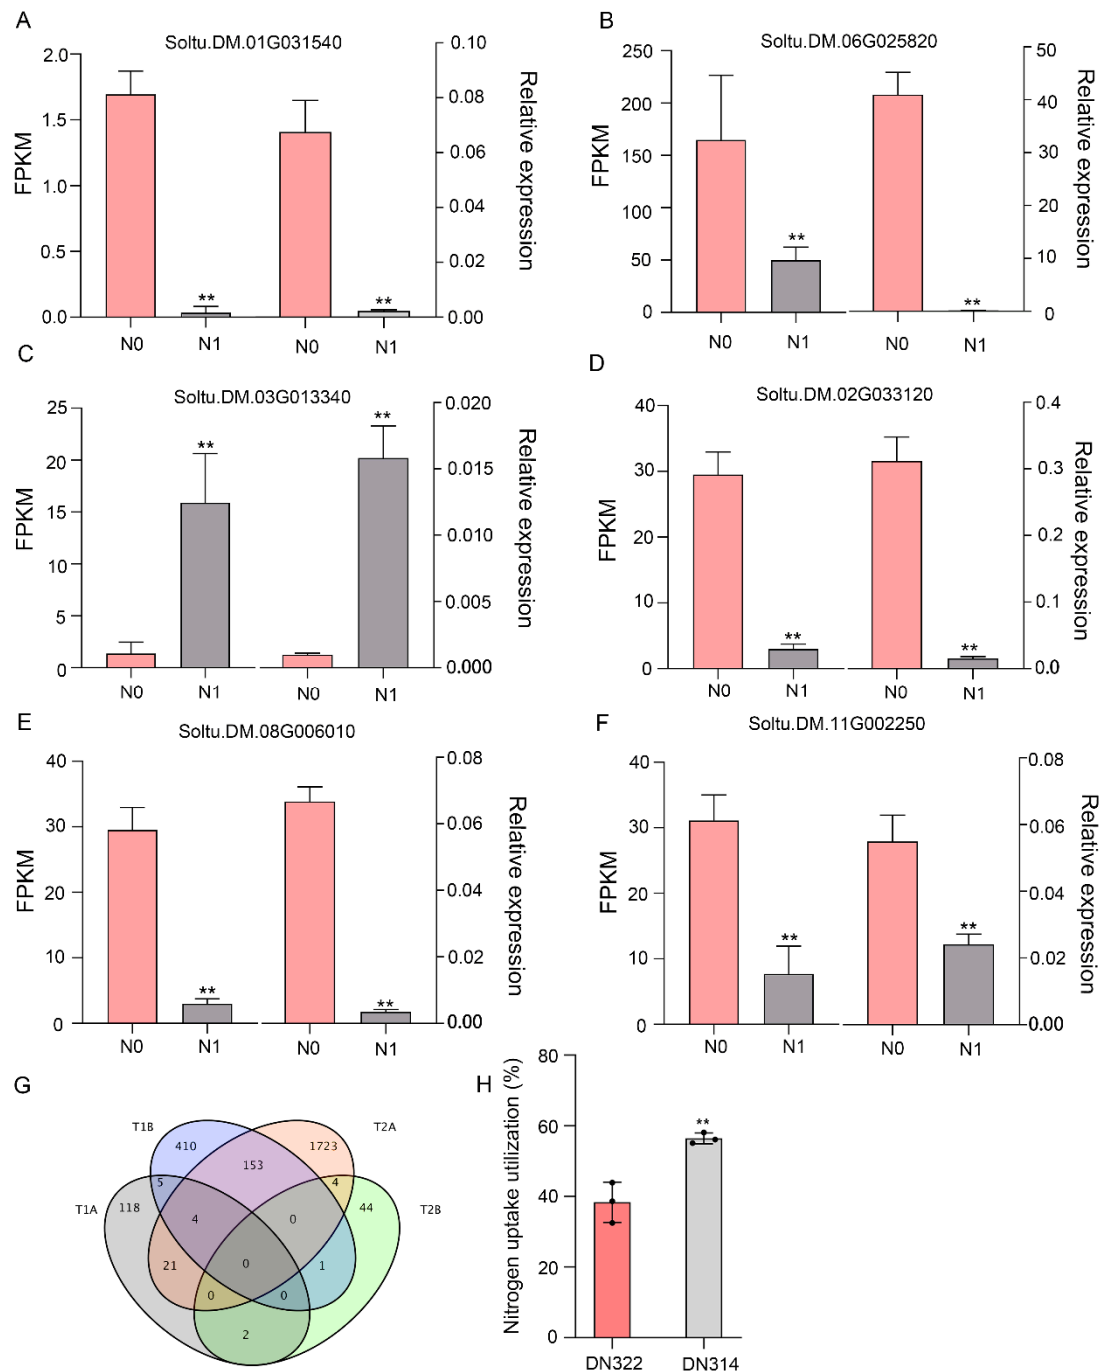

Supplemental Figure S2 The RT-qPCR verification of DN322 and DN314 and DEGs analysis and nitrogen uptake utilization (NUE). (A-F) qRT-PCR was used to verify the reliability of different gene RNA-Seq results. RNA-Seq sequencing on the left and RT-qPCR on the right. (G) The Venn plot analyzes the same DEGs for different treated potatoes. T1 represents seedling stage, T2 represents tuber formation stage, A represents DN322 B represents DN314. (H) Nitrogen uptake utilization of DN322 and DN314. Data in Supplemental Figure S2 are means±SD. Two-tailed unpaired t test with Welch's correction is used for statistical analysis. Statistically great significant differences ( $P < 0.01$ ) are indicated by two stars.
