# Supplementary material
Source: MDPI journal article supplement (https://www.mdpi.com/2073-4395/13/8/2164)
Supplement: s1 [file s1]

**Supplemental Table S8 Proportion of DEGs in each WGCNA module at seedling stage**

| <b>Model</b> | <b>Percentage (%)</b> |
|--------------|-----------------------|
| SM1          | 2.53                  |
| SM2          | 3.49                  |
| SM3          | 3.34                  |
| SM4          | 8.08                  |
| SM5          | 1.52                  |
| SM6          | 10.41                 |
| SM7          | 19.44                 |
| SM8          | 13.73                 |
| SM9          | 44.74                 |
| SM10         | 60.61                 |
| SM11         | 15.27                 |
| SM12         | 4.66                  |
| SM13         | 2.29                  |
| SM14         | 16.04                 |

**Supplemental Table S9 Proportion of DEGs in each WGCNA module at tuber formation stage**

| <b>Module</b> | <b>Percentage (%)</b> |
|---------------|-----------------------|
| TM1           | 51.35                 |
| TM2           | 18.96                 |
| TM3           | 8.63                  |
| TM4           | 0.00                  |
| TM5           | 24.44                 |
| TM6           | 35.94                 |
| TM7           | 6.96                  |
| TM8           | 8.35                  |
| TM9           | 1.71                  |
| TM10          | 11.90                 |
| TM11          | 12.89                 |
| TM12          | 1.32                  |
| TM13          | 6.51                  |
| TM14          | 8.78                  |
| TM15          | 0.00                  |
