# Supplementary material
Source: MDPI journal article supplement (https://www.mdpi.com/2073-4395/13/8/2164)
Supplement: s1 [file s1]

**Supplemental Table S1 Nitrogen deficiency stress phenotype**

| Stage | Phenotype                                                       | Cultivars | N0    | N1     | Variation |
|-------|-----------------------------------------------------------------|-----------|-------|--------|-----------|
| SS    | DMW per plant (g)                                               | DN322     | 8.99  | 21.89  | 60.7%     |
|       |                                                                 | DN314     | 5.91  | 27.60  | 78.6%     |
| TFS   |                                                                 | DN322     | 17.59 | 32.03  | 45.1%     |
| DN314 |                                                                 | 13.34     | 69.52 | 80.8%  |           |
| TFS   | DMW of tuber (g)                                                | DN322     | 17.59 | 32.03  | 45.1%     |
|       |                                                                 | DN314     | 13.37 | 69.52  | 80.8%     |
| SS    | Net photosynthetic rate<br>( $\mu\text{m}/\text{m}^2\text{s}$ ) | DN322     | 5.20  | 8.68   | 40.1%     |
|       |                                                                 | DN314     | 9.72  | 16.11  | 39.7%     |
| TFS   |                                                                 | DN322     | 12.82 | 21.75  | 41.0%     |
|       |                                                                 | DN314     | 16.87 | 28.46  | 40.7%     |
| SS    | Root vatality( $\mu\text{g}/\text{gh}$ )                        | DN322     | 71.25 | 84.22  | 15.4%     |
|       |                                                                 | DN314     | 73.69 | 126.65 | 41.8%     |
| TFS   |                                                                 | DN322     | 80.93 | 106.44 | 24.0%     |
|       |                                                                 | DN314     | 84.08 | 146.23 | 42.5%     |

Note: SS represents seedling stage, TFS represents tuber formation stage, DMW represents dry matter weight.

**Supplemental Table S2 RNA-seq quality of DN322**

| Samples | Clean reads | % $\geq$ Q30 |
|---------|-------------|--------------|
| T1AN0a  | 22573267    | 0.9391       |
| T1AN0b  | 21576255    | 0.9363       |
| T1AN0c  | 22063493    | 0.9401       |
| T1AN1a  | 21653028    | 0.937        |
| T1AN1b  | 20600089    | 0.9392       |
| T1AN1c  | 20457525    | 0.9367       |
| T2AN0a  | 20907833    | 0.9432       |
| T2AN0b  | 26384273    | 0.9341       |
| T2AN0c  | 31881882    | 0.9336       |
| T2AN1a  | 24618676    | 0.9403       |
| T2AN1b  | 23050962    | 0.9346       |
| T2AN1c  | 20712285    | 0.9125       |

Note: T1 represents seedling stage, T2 represents tuber formation stage, A represents DN322, a, b or c represents different biological replicates.

**Supplemental Table S3 RNA-seq quality of DN314**

| Samples | Clean reads | % $\geq$ Q30 |
|---------|-------------|--------------|
| T1BN0a  | 22,386,333  | 93.95%       |
| T1BN0b  | 20,509,105  | 93.85%       |
| T1BN0c  | 19,789,862  | 93.20%       |
| T1BN1a  | 19,127,622  | 93.88%       |
| T1BN1b  | 20,731,954  | 93.44%       |
| T1BN1c  | 19,190,456  | 92.55%       |
| T2BN0a  | 20,849,296  | 93.55%       |
| T2BN0b  | 20,614,437  | 94.35%       |
| T2BN0c  | 22,712,674  | 91.38%       |
| T2BN1a  | 21,236,740  | 92.52%       |
| T2BN1b  | 21,059,689  | 93.40%       |
| T2BN1c  | 19,516,017  | 94.19%       |

Note: T1 represents seedling stage, T2 represents tuber formation stage, B represents DN322, a, b or c represents different biological replicates.
